# Supplementary material
Source: Springer Nature journal article supplement (https://www.springermedizin.de/resource/supplementary/12990_2010_339_MOESM1_ESM.pdf/9613072)

**A. LI4 and LI 3**

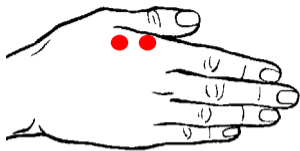

**B.**

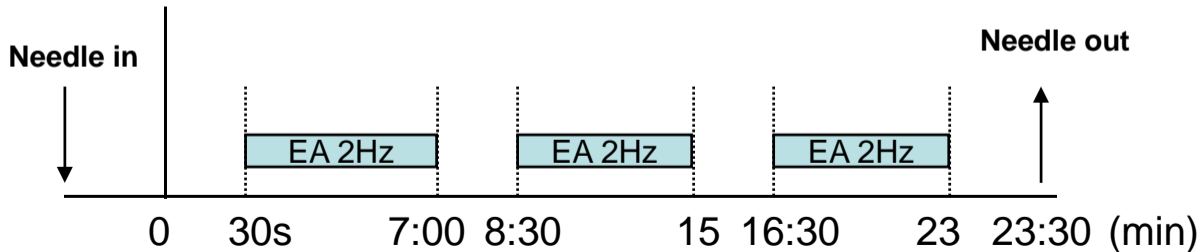

Supplement: MOESM1 [file 9613072]
